# Supplementary material
Source: Springer Nature journal article supplement (https://www.springermedizin.de/resource/supplementary/12935_2011_325_MOESM5_ESM.pdf/9540368)

[A]

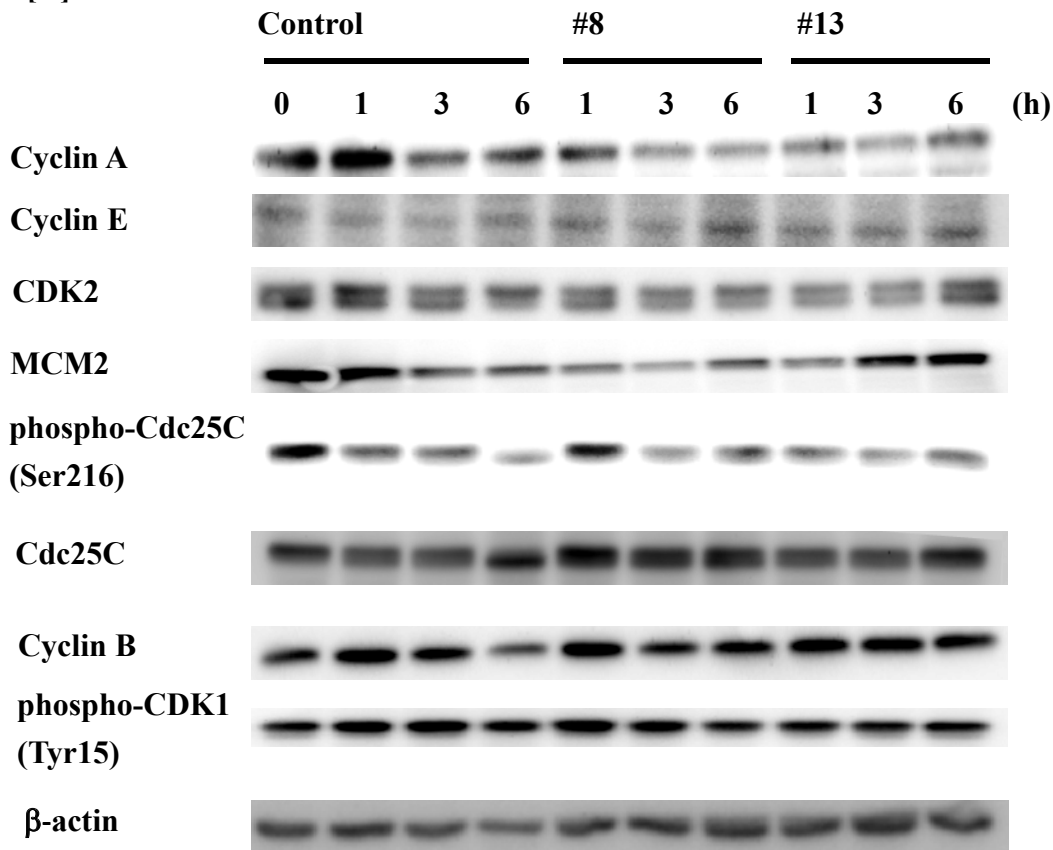

[B]

Control #8 #13

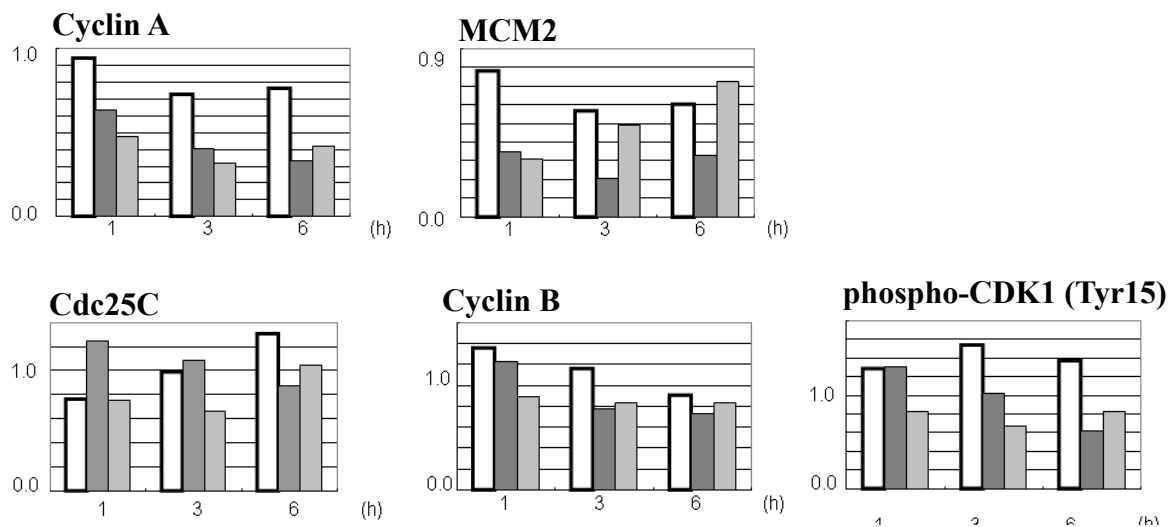

Supplement: MOESM5 [file 9540368]
